# Supplementary material
Source: publisher figshare collection journal article supplement (https://acs.figshare.com/ndownloader/files/27191108)
Supplement: Supplementary file 1 [file 27191108]

**Supporting Information**  
**for**  
**Postchronic Single-Walled Carbon Nanotube Exposure Causes**  
**Irreversible Malignant Transformation of Human Bronchial**  
**Epithelial Cells through DNA Methylation Changes**

*Jin Wang,<sup>†,‡</sup> Xin Tian,<sup>‡,‡</sup> Jie Zhang,<sup>†</sup> Lirong Tan,<sup>†</sup> Nan OuYang,<sup>†</sup> Beibei Jia,<sup>†</sup>  
Chunying Chen,<sup>§</sup> Cuicui Ge,<sup>\*,‡</sup> and Jianxiang Li<sup>\*,†</sup>*

<sup>†</sup>Department of Toxicology, School of Public Health, Medicine College, Soochow University, Suzhou, 215123, China

<sup>‡</sup>State Key Laboratory of Radiation Medicine and Protection, School of Radiation Medicine and Protection, School for Radiological and Interdisciplinary Sciences (RAD-X), Collaborative Innovation Center of Radiation Medicine of Jiangsu Higher Education Institutions, Soochow University, Suzhou 215123, China

<sup>§</sup>Key Laboratory for Biomedical Effects of Nanomaterials and Nanosafety & CAS Center for Excellence in Nanoscience, National Center for Nanoscience and Technology of China, Chinese Academy of Sciences, Beijing 100190, China

<sup>#</sup>J.W. and X.T. contributed equally to this work.

<sup>\*</sup>Corresponding authors:

Cuicui Ge, E-mail: ccge@suda.edu.cn; Jianxiang Li, E-mail: aljxcr@suda.edu.cn

## Other Methods

**DNA Methylation Microarray Profiling.** The level of epigenome-wide DNA methylation of BEAS-2B cells was analyzed by Infinium Methylation EPIC 850K Beadchip (Illumina Inc., USA). DNA methylation is determined by measuring the fluorescent signals from the unmethylated (U) and methylated (M) probes specific for each site included in the array. The probe signal intensities were normalized by quantile algorithm in ‘methyllumi’ and ‘minif’ packages from R Bioconductor and the normalized signal intensities were then used to calculate the  $\beta$  values. After calculating the arithmetic average of the signal values of all the probes in each region, a pooled *t*-test was used to screen the differentially methylated genes (DMGs) of the sample group, as defined by a threshold of  $P < 0.05$  and  $|\Delta\beta| > 0.14$ . To verify the reliability of the methylation microarray result, the methylation status of the top 3 DMGs were measured by methylation-specific PCR (MSP). The total DNA was extracted using the DNA extraction kit (Tiangen, China) and modified using the EpiTect Bisulfite Kit (Qiagen, Germany). MSP primers were designed using MethPrimer (<http://www.urogene.org/cgi-bin/methprimer/methprimer.cgi>) (primers and conditions available in **Table S9**).

**mRNA Sequencing.** Total cellular RNA was isolated from BEAS-2B cells by using TRIzol reagent (Invitrogen, Carlsbad, CA, USA) according to the manufacturer’s protocol. mRNA sequencing was performed on the Illumina HiSeq 4000 platform, using 150 bp paired-end sequencing with a fragment size of 200-400 bp. The Illumina TruSeq RNA kit was used for preparing the mRNA sequencing

library. The mRNAs with expression profiles that differed between the samples were normalized as fragments per kilobase of transcript per million mapped reads (FPKM). Differential expression analysis of two groups was performed using the “DEGseq” package.  $P < 0.05$  and  $|\log_2(\text{fold change})| \geq 1$  were set as the threshold for differentially expressed genes (DEGs).

**Real-Time Quantitative PCR.** A total of 1.5  $\mu\text{g}$  RNA isolated from each sample was reversely transcribed into complementary DNA (cDNA) using Revert Aid First Strand Complementary DNA Synthesis kit (ThermoFisher Scientific, Waltham, MA, USA) according to the manufacturer’s instructions. RT-qPCR was performed using NovoScript® SYBR Two-Step qRT-PCR kit (novoprotein, China) with a QuantStudio™ 6 Flex qRT-PCR system (ABI, Rockford, IL, USA). The internal control for the analysis of mRNA was GAPDH. The primer used for qPCR were listed in **Table S10**.

**Enrichment Analyses.** To investigate the biological function of DEGs or DMGs, the online enrichment tool DAVID (<https://david.ncifcrf.gov/>) was used to undergo the Gene Ontology (GO) and Kyoto Encyclopedia of Genes and Genomes (KEGG) pathway enrichment analyses. The results were visualized by R package “GOpilot”.

**Methylation Pattern of DMGs in Lung Cancer.** The MEXPRESS (<https://mexpress.be>) is a user-friendly online tool for analyzing and visualization of TCGA data, providing a simple way for researchers to analyze the multi-omics data in the TCGA database. The correlation between the mRNA expression levels and DNA

methylation values of DMGs in lung cancer were assessed using the MEXPRESS tool.

**Table S1. Characterization of SWCNTs**

| Property                       | Value | Unit              | Characterization method |
|--------------------------------|-------|-------------------|-------------------------|
| Outer Diameter                 | <2    | nm                | HRTEM, Raman            |
| Purity                         | >95   | wt%               | TGA, TEM                |
| Length                         | 5-30  | μm                | TEM                     |
| Special Surface Area           | >490  | m <sup>2</sup> /g | BET                     |
| Ash content                    | <5    | wt%               | HRTEM, TGA              |
| Electric Conductivity          | >100  | s/cm              | NA                      |
| Tap Density                    | 0.14  | g/cm <sup>3</sup> | NA                      |
| Ignition point                 | 610   | °C                | NA                      |
| I <sub>g</sub> /I <sub>d</sub> | >20   | NA                | Raman                   |

NA: not applicable; HRTEM: high resolution transmission electron microscope; TGA:

thermogravimetric analyzer

**Table S2. Physicochemical characterization of SWCNTs and carbon black**

|                                       | unit | SWCNTs             | Carbon black       |
|---------------------------------------|------|--------------------|--------------------|
| Hydrodynamic size in H <sub>2</sub> O | nm   | 158.3 $\pm$ 9      | 212.7 $\pm$ 0.6    |
| Hydrodynamic size in DMEM             | nm   | 194.5 $\pm$ 22     | 260.5 $\pm$ 0.2    |
| $\zeta$ potential in H <sub>2</sub> O | mV   | -33.1 $\pm$ 0.6    | -9.1 $\pm$ 0.1     |
| $\zeta$ potential in DMEM             | mV   | -9.3 $\pm$ 0.4     | -6.8 $\pm$ 0.5     |
| Elemental analysis                    | wt.% | 0.54% Al, 0.68% Fe | 0.31% Al, 0.74% Fe |

**Table S3. Top 10 genes methylated in the promoter region**

| TSS1500   | <i>P</i> value | $\beta$ difference | TSS200    | <i>P</i> value | $\beta$ difference |
|-----------|----------------|--------------------|-----------|----------------|--------------------|
| AREG      | 4.29           | -0.314             | XAGE5     | 2.51           | -0.338             |
| ATIC      | 4.00           | -0.312             | CXCL10    | 3.10           | -0.279             |
| CD2AP     | 4.90           | -0.304             | FUCA1     | 4.55           | -0.268             |
| NDUFV3    | 3.91           | -0.291             | C9orf91   | 3.50           | -0.265             |
| EIF3I     | 2.54           | -0.287             | EMR3      | 3.14           | -0.262             |
| ZNF438    | 3.25           | -0.285             | RANBP17   | 3.75           | -0.261             |
| ECH1      | 4.50           | -0.270             | SCNN1G    | 3.31           | -0.254             |
| PRKAG1    | 2.33           | -0.267             | SIM2      | 3.81           | -0.250             |
| TTC26     | 2.22           | -0.263             | TLL1      | 2.89           | -0.247             |
| EMP2      | 2.14           | -0.262             | TMSB15B   | 2.84           | -0.246             |
| SREBF1    | 2.62           | 0.268              | MIR628    | 4.44           | 0.269              |
| FKSG83    | 2.95           | 0.285              | TCEAL7    | 2.56           | 0.271              |
| TAB3      | 3.12           | 0.286              | RTN4RL1   | 3.39           | 0.272              |
| GFAP      | 2.60           | 0.290              | FOXP4-AS1 | 2.80           | 0.284              |
| PIK3CG    | 2.01           | 0.301              | C21orf128 | 2.16           | 0.284              |
| AWAT2     | 2.92           | 0.329              | KCNG3     | 3.51           | 0.289              |
| SRPX2     | 3.19           | 0.336              | MIR325    | 2.18           | 0.297              |
| ZCCHC5    | 2.65           | 0.339              | ITM2A     | 2.68           | 0.316              |
| YES1      | 2.71           | 0.355              | SNORA8    | 3.06           | 0.336              |
| COX10-AS1 | 2.97           | 0.361              | CNBD1     | 2.90           | 0.339              |

**Table S4. Biological process enrichment of the differentially methylated genes**

| Term                                                                   | Count | <i>P</i> value | Gene ratio (%) |
|------------------------------------------------------------------------|-------|----------------|----------------|
| Astrocyte development                                                  | 4     | 0.010          | 25.00%         |
| Macrophage derived foam cell differentiation                           | 3     | 0.012          | 50.00%         |
| Cilium morphogenesis                                                   | 10    | 0.018          | 7.35%          |
| Mitotic spindle assembly                                               | 5     | 0.020          | 13.89%         |
| Transcription-coupled nucleotide-excision repair                       | 7     | 0.021          | 9.46%          |
| Nucleotide-excision repair, DNA incision                               | 5     | 0.024          | 13.16%         |
| Potassium ion transmembrane transport                                  | 9     | 0.025          | 7.44%          |
| Integrin-mediated signaling pathway                                    | 8     | 0.026          | 8.08%          |
| Hemopoiesis                                                            | 6     | 0.028          | 10.17%         |
| Positive regulation of transcription from RNA polymerase ii promoter   | 40    | 0.031          | 4.08%          |
| Nucleotide-binding oligomerization domain containing signaling pathway | 4     | 0.035          | 16.00%         |
| Phosphatidylcholine biosynthetic process                               | 4     | 0.035          | 16.00%         |
| Sleep                                                                  | 3     | 0.039          | 27.27%         |
| Blood circulation                                                      | 5     | 0.041          | 11.11%         |
| Phosphatidylinositol 3-kinase signaling                                | 4     | 0.043          | 14.81%         |
| Cardiac muscle cell differentiation                                    | 4     | 0.043          | 14.81%         |
| Fatty acid transport                                                   | 3     | 0.046          | 25.00%         |
| Excitatory postsynaptic potential                                      | 4     | 0.047          | 14.29%         |
| Negative regulation of interferon-gamma production                     | 4     | 0.047          | 14.29%         |
| Covalent chromatin modification                                        | 8     | 0.047          | 7.08%          |
| Cellular response to starvation                                        | 5     | 0.047          | 10.64%         |
| Organ regeneration                                                     | 5     | 0.047          | 10.64%         |
| Chemical synaptic transmission                                         | 13    | 0.049          | 5.42%          |



**Table S5. Top 20 differentially expressed genes in PE60 cells**

| Up         | -Log10<br>(P value) | Log2<br>(Fold change) | Down    | -Log10<br>(P value) | Log2<br>(Fold change) |
|------------|---------------------|-----------------------|---------|---------------------|-----------------------|
| FLG        | <300                | -4.814                | PLAGL1  | 41.40               | 1.417                 |
| SCN9A      | 257.30              | -4.050                | ENPP1   | 38.60               | 1.451                 |
| TNS4       | 121.95              | -3.666                | C1QTNF1 | 19.71               | 1.474                 |
| AC079466.1 | 199.04              | -3.582                | TIE1    | 58.29               | 1.481                 |
| PSG1       | <300                | -3.205                | THBD    | 22.89               | 1.488                 |
| MFAP5      | 97.36               | -3.089                | TBKBP1  | 38.23               | 1.494                 |
| CHAT       | 45.11               | -2.927                | COL4A1  | 39.46               | 1.496                 |
| PDE1C      | <300                | -2.552                | COL4A2  | 78.13               | 1.526                 |
| FYB        | 141.30              | -2.471                | APCDD1L | 18.84               | 1.537                 |
| PSG11      | 50.11               | -2.466                | C3      | 139.00              | 1.545                 |
| PSG5       | 144.22              | -2.360                | PRKD3   | 95.14               | 1.563                 |
| SLAMF7     | 41.80               | -2.324                | CAMK2N1 | 41.20               | 1.599                 |
| DSP        | 108.38              | -2.158                | CXCL1   | 82.34               | 1.618                 |
| PSG2       | 131.83              | -2.140                | CYP26B1 | 48.75               | 1.710                 |
| PSG6       | 67.75               | -2.114                | L1CAM   | 142.75              | 1.758                 |
| FLJ22447   | 41.57               | -2.094                | CHI3L1  | 34.55               | 1.818                 |
| GRIK5      | 42.02               | -2.058                | IGFN1   | 55.42               | 1.878                 |
| EREG       | 125.00              | -2.055                | MMP9    | 38.27               | 2.018                 |
| PLAC8      | 30.30               | -2.035                | ADCY1   | 87.14               | 2.100                 |
| KIRREL3    | 40.67               | -2.011                | CXCL8   | 187.31              | 2.130                 |

**Table S6. Biological process enrichment of the differentially expressed genes**

| Term                                              | Count | <i>P</i> value | Gene ratio (%) |
|---------------------------------------------------|-------|----------------|----------------|
| Female pregnancy                                  | 7     | <0.001         | 7.87%          |
| Angiogenesis                                      | 9     | <0.001         | 4.04%          |
| Immune response                                   | 12    | <0.001         | 2.85%          |
| Inflammatory response                             | 11    | 0.001          | 2.90%          |
| Peripheral nervous system development             | 4     | 0.001          | 16.67%         |
| Collagen catabolic process                        | 5     | 0.001          | 7.81%          |
| Chemokine-mediated signaling pathway              | 5     | 0.002          | 7.04%          |
| Response to molecule of bacterial origin          | 3     | 0.002          | 33.33%         |
| Chemotaxis                                        | 6     | 0.002          | 4.92%          |
| Wound healing                                     | 5     | 0.003          | 6.25%          |
| MAPK cascade                                      | 8     | 0.003          | 3.05%          |
| Signal transduction                               | 18    | 0.005          | 1.55%          |
| Peptidyl-tyrosine phosphorylation                 | 6     | 0.006          | 3.92%          |
| Skeletal muscle cell differentiation              | 4     | 0.006          | 8.16%          |
| Cellular response to lipopolysaccharide           | 5     | 0.010          | 4.42%          |
| Synapse assembly                                  | 4     | 0.010          | 6.56%          |
| Positive regulation of neutrophil chemotaxis      | 3     | 0.011          | 13.64%         |
| Regulation of glucose metabolic process           | 3     | 0.011          | 13.64%         |
| Positive regulation of phosphorylation            | 3     | 0.015          | 12.00%         |
| Extracellular matrix organization                 | 6     | 0.015          | 3.06%          |
| Cellular response to interleukin-1                | 4     | 0.016          | 5.63%          |
| Patterning of blood vessels                       | 3     | 0.018          | 10.71%         |
| Ossification                                      | 4     | 0.021          | 5.00%          |
| Peyer's patch morphogenesis                       | 2     | 0.022          | 66.67%         |
| Positive regulation of MAPK cascade               | 4     | 0.022          | 4.94%          |
| Mesoderm development                              | 3     | 0.023          | 9.38%          |
| Positive regulation of protein kinase b signaling | 4     | 0.024          | 4.76%          |
| Skin development                                  | 3     | 0.026          | 8.82%          |
| Protein localization to adherens junction         | 2     | 0.029          | 50.00%         |
| Axon guidance                                     | 5     | 0.030          | 3.14%          |
| Response to lipopolysaccharide                    | 5     | 0.033          | 3.05%          |
| Collagen fibril organization                      | 3     | 0.034          | 7.69%          |
| Transcription from RNA polymerase ii promoter     | 9     | 0.036          | 1.75%          |

|                                                               |   |       |        |
|---------------------------------------------------------------|---|-------|--------|
| Nail development                                              | 2 | 0.044 | 33.33% |
| Collagen-activated tyrosine kinase receptor signaling pathway | 2 | 0.044 | 33.33% |
| Positive regulation of receptor binding                       | 2 | 0.044 | 33.33% |
| Outflow tract morphogenesis                                   | 3 | 0.045 | 6.52%  |
| Cellular response to amino acid stimulus                      | 3 | 0.047 | 6.38%  |
| Cellular response to tumor necrosis factor                    | 4 | 0.048 | 3.64%  |
| Regulation of cell proliferation                              | 5 | 0.048 | 2.70%  |

---

**Table S7. KEGG pathway enrichment of the differentially expressed genes**

| Term                                   | Count | <i>P</i> value | Gene ratio (%) |
|----------------------------------------|-------|----------------|----------------|
| Cytokine-cytokine receptor interaction | 9     | 0.001          | 3.70%          |
| Pathways in cancer                     | 11    | 0.002          | 2.80%          |
| Amoebiasis                             | 6     | 0.002          | 5.66%          |
| TNF signaling pathway                  | 6     | 0.002          | 5.61%          |
| ECM-receptor interaction               | 5     | 0.007          | 5.75%          |
| Hematopoietic cell lineage             | 5     | 0.007          | 5.75%          |
| Glutathione metabolism                 | 4     | 0.010          | 7.84%          |
| Legionellosis                          | 4     | 0.012          | 7.41%          |
| NOD-like receptor signaling pathway    | 4     | 0.013          | 7.14%          |
| ARVC                                   | 4     | 0.021          | 5.97%          |
| Salmonella infection                   | 4     | 0.037          | 4.82%          |
| Protein digestion and absorption       | 4     | 0.043          | 4.55%          |

**Table S8. Gene list of the cross-analysis of DMGs and DEGs**

| Gene symbol | log2 (Fold change) | $\beta$ difference | LUAD | LUSC |
|-------------|--------------------|--------------------|------|------|
| PLEKHA7     | -1.61924           | -0.1824            | up   | down |
| GLIS1       | -1.56449           | -0.15586           | up   | up   |
| SYBU        | -0.85087           | -0.15331           | down | down |
| KANK4       | -1.8115            | -0.1493            | down | down |
| CD7         | -0.60415           | -0.14431           | no   | down |
| PPL         | -1.07512           | 0.143542           | down | no   |
| PLAC8       | -2.03495           | 0.147265           | down | down |
| MYEOV       | -0.9121            | 0.147738           | up   | up   |
| ZNF154      | -1.14443           | 0.156159           | no   | down |
| CCR7        | -1.45614           | 0.156251           | no   | down |
| SPINT2      | -1.45623           | 0.173276           | up   | up   |
| HAS3        | -0.95282           | 0.182273           | down | up   |
| PPP1R3C     | -0.93161           | 0.200882           | down | down |
| PKP2        | -0.72219           | 0.207832           | up   | up   |
| CAMK2N1     | -2.01098           | 0.211313           | no   | down |
| NLRP10      | -1.34794           | 0.213733           | no   | up   |
| ZNF674-AS1  | -0.61396           | 0.22099            | -    | -    |
| NNMT        | -0.76466           | 0.224918           | no   | down |
| MYPN        | -1.36403           | 0.227799           | up   | no   |
| ITM2A       | -1.02233           | 0.316059           | down | down |
| PRSS12      | 0.589252           | -0.14974           | down | down |
| TMPRSS9     | 0.863492           | -0.26303           | up   | up   |
| PIM2        | 1.656682           | -0.23817           | up   | no   |
| ELMOD1      | 0.635065           | -0.17515           | down | down |
| ZMIZ2       | 0.653848           | -0.16824           | up   | no   |
| PAPPA       | 1.838318           | -0.16107           | no   | no   |
| SNAI3       | 0.681246           | -0.15791           | down | down |
| CACTIN-AS1  | 0.59136            | -0.1545            | -    | -    |
| SNX19       | 0.765857           | -0.15034           | no   | down |
| IL32        | 0.913916           | 0.14385            | no   | down |
| RGS17       | 0.957131           | 0.146475           | up   | up   |
| SPOCD1      | 1.093398           | 0.151233           | down | down |

|          |          |          |      |      |
|----------|----------|----------|------|------|
| RAB6B    | 0.94437  | 0.176995 | up   | up   |
| MAPK8IP1 | 0.868597 | 0.177736 | no   | down |
| CCDC71L  | 0.683085 | 0.197512 | -    | -    |
| KIRREL3  | 1.599182 | 0.220459 | up   | no   |
| ABCC9    | 0.93518  | 0.256213 | down | down |

---

**Table S9. Methylation-specific PCR primers used in this study**

| Primers   | Sequence                    | Product size |
|-----------|-----------------------------|--------------|
| PIM2_MF   | GGAGTTTTGGATAGTTATAAGCGC    | 103          |
| PIM2_MR   | CCTTTCCTAAAAAATTAATTTACCG   |              |
| PIM2_UF   | GAGTTTTGGATAGTTATAAGTGTGA   | 103          |
| PIM2_UR   | TCCTTTCCTAAAAAATTAATTTACCAC |              |
| ABCA2_MF  | TGAAATCGTTTATTTTTTTAGGTTCG  | 137          |
| ABCA2_MR  | TACAAAACTCCCTAACTACAACCG    |              |
| ABCA2_UF  | GAAATTGTTTATTTTTTTAGGTTTGT  | 135          |
| ABCA2_UR  | ACAAAACTCCCTAACTACAACCAC    |              |
| CRYBG3_MF | TTTTTAAAAGTTCTGAAGAAAATCGT  | 173          |
| CRYBG3_MR | GACCTAAAAACCTAAAAAAAATCGC   |              |
| CRYBG3_UF | TTTTTAAAAGTTTGAAGAAAATTGT   | 174          |
| CRYBG3_UR | CAACCTAAAAACCTAAAAAAAATCAC  |              |

**Table S10. qPCR primers used in this study**

| Primers | Sequence                |
|---------|-------------------------|
| GAPDH_F | GGAGCGAGATCCCTCCAAAAT   |
| GAPDH_R | GGCTGTTGTCATACTTCTCATGG |
| FLG_F   | TGAAGCCTATGACACCACTGA   |
| FLG_R   | TCCCCTACGCTTTCTTGTCCT   |
| SCN9A_F | AGAGGGGTACACCTGTGTGAA   |
| SCN9A_R | CCCAGGAAAATCACTACGACAAA |
| TNS4_F  | AGCCAGGGGCTTTTGTCATAA   |
| TNS4_R  | AGACGACTCGATGAGGAAGTG   |
| CXCL8_F | TTTGTCCAAGGAGTGCTAAAGA  |
| CXCL8_R | AACCCTCTGCACCCAGTTTTC   |
| ADCY1_F | AGGCACGACAATGTGAGCATC   |
| ADCY1_R | TTCATCGAACTTGCCGAAGAG   |



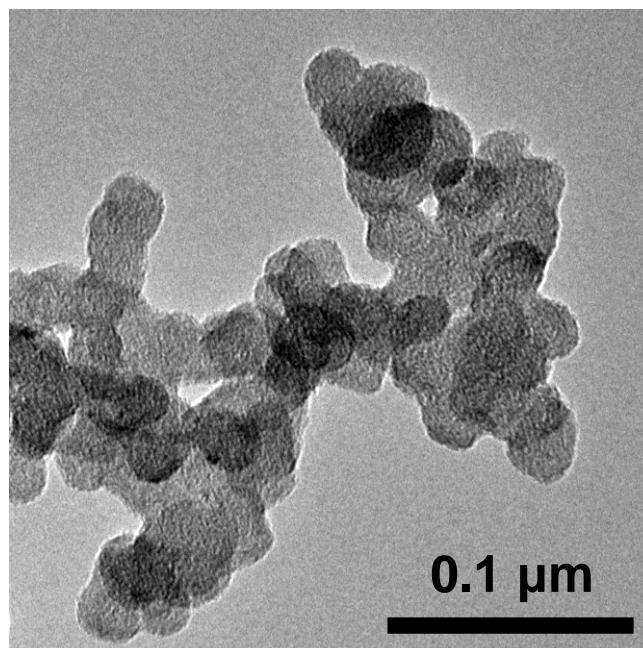

**Figure S1.** Representative TEM image of carbon black.

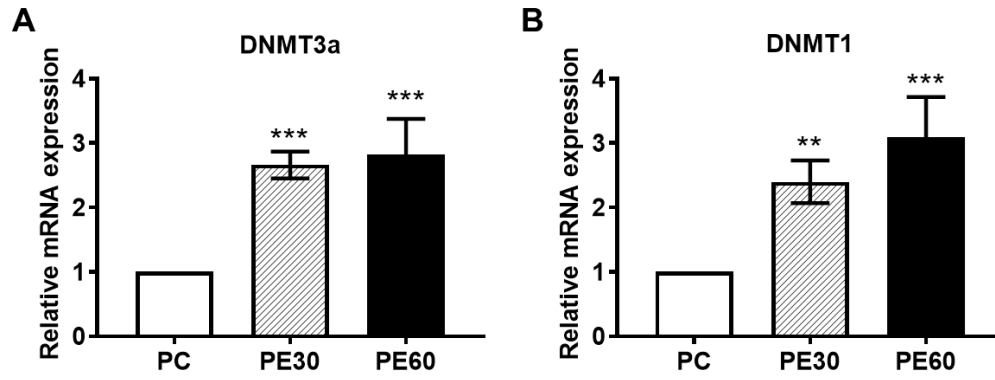

**Figure S2.** The expression of DNA methylase in PE cells. The mRNA expression levels of (A) DNMT3a and (B) DNMT1 in PE cells. \*\* $P < 0.01$  vs. PC cells; \*\*\* $P < 0.001$  vs. PC cells.

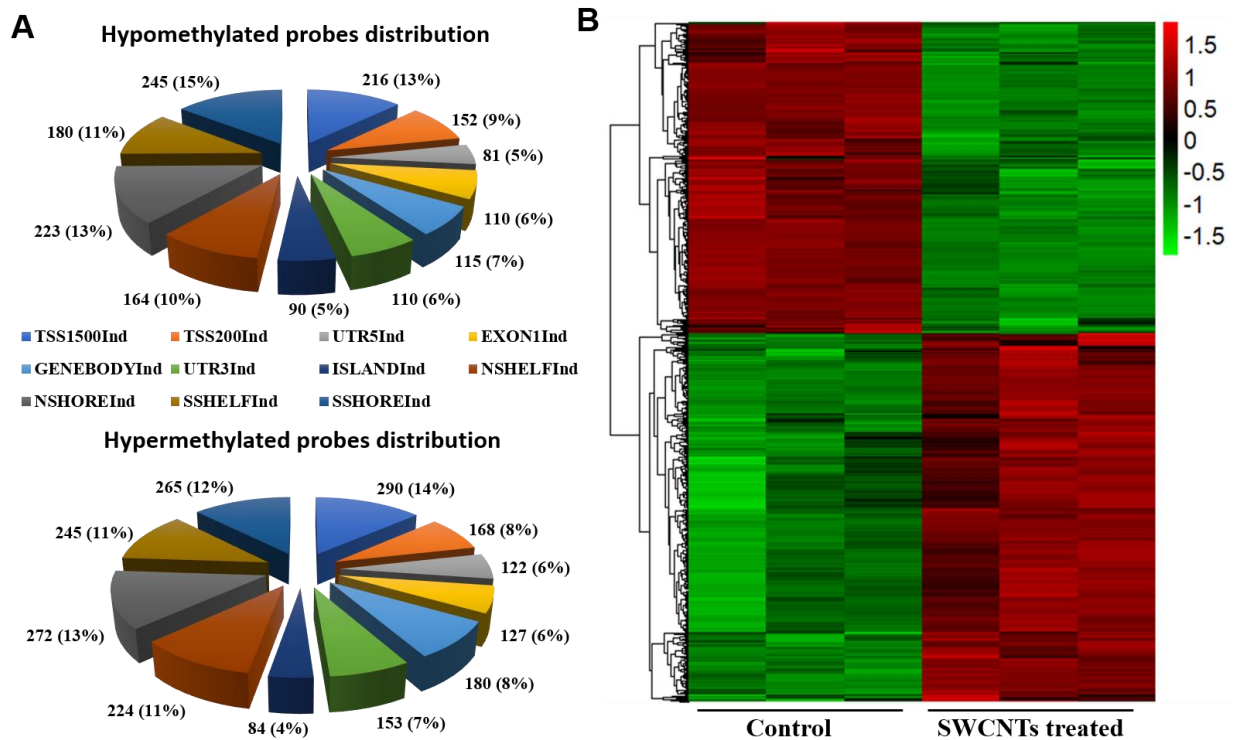

**Figure S3.** Differentially methylated probes and differentially expressed genes in PE60 cells. (A) Percentage of differentially methylated probes in PE60 cells *vs.* PC60 cells. (B) Heatmap of the 148 differentially expressed genes of PE60 cells. The colors in the heatmap represent the normalized expression values, with low expression values being colored in shades of green and high expression values in shades of red.

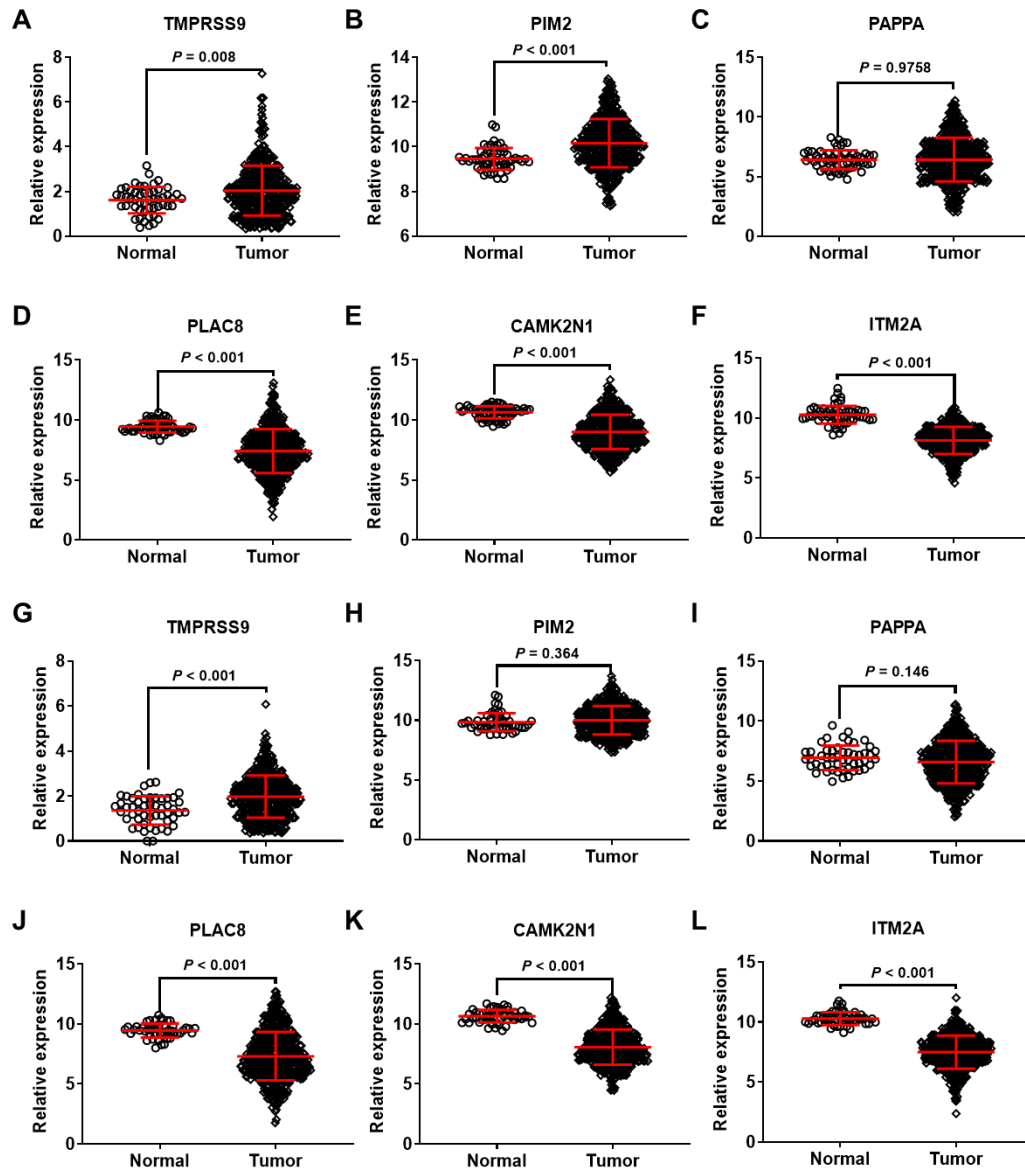

**Figure S4.** Expression of different expressed DMGs in lung cancer in TCGA database. Expression of TMPRSS9 (A), PIM2 (B), PAPA (C), PLAC8 (D), and CAMK2N1 (E), as well as ITM2A (F) in TCGA LUAD dataset. Expression of TMPRSS9 (G), PIM2 (H), PAPA (I), PLAC8 (J), and CAMK2N1 (K), as well as ITM2A (L) in TCGA LUSC dataset.
